# Supplementary material for: Homoplastic single nucleotide polymorphisms contributed to phenotypic diversity in Mycobacterium tuberculosis
Source: PubMed Central journal article supplement (PMC7229016; doi:10.1038/s41598-020-64895-4), 2020-05-15
Supplement: 41598_2020_64895_MOESM1_ESM.pdf [file 41598_2020_64895_MOESM1_ESM.pdf]

**Supplementary information for the manuscript**

**Homoplastic single nucleotide polymorphisms contributed to phenotypic diversity in**

***Mycobacterium tuberculosis***

Pornpen Tantivitayakul<sup>1</sup>, Wuthiwat Ruangchai<sup>2</sup>, Tada Juthayothin<sup>3</sup>, Nat Smittipat<sup>3</sup>, Areeya Disratthakit<sup>4</sup>,  
Surakameth Mahasirimongkol<sup>4</sup>, Wasna Viratyosin<sup>3</sup>, Katsushi Tokunaga<sup>5</sup>, Prasit Palittapongarnpim<sup>2,3\*</sup>

## **Description of Supplementary information**

### **Supplementary data:**

Predicted functional effects of nonsynonymous SNPs on protein function of Mtb genes related to tuberculosis agent resistance, virulence, cell surface-exposed lipid and lipid metabolism, cell wall and cell wall process.

### **Supplementary Figure S1**

Representation of average percentages of the number of homoplasmic SNPs per total SNPs identified in each functionally categorized genes of 4 different Mtb lineages: *i*) virulence and detoxification (VF, n=226), *ii*) lipid metabolism (LM, n=238), *iii*) information pathway (IP, n=232), *iv*) cell wall and cell process (CW, n=751), *v*) *pe/ppe* family protein (PE\_PPE, n=168), *vi*) intermediary metabolism and respiration (IMR, n=898), *vii*) regulatory protein (RP, n=193), *viii*) conserved hypothetical protein (CHP, n=1,163). Statistical differences were evaluated with the nonparametric kruskal-wallis test. Asterisks (\*) showed the *pe/ppe* groups of Mtb lineage 1, 2 and 3 had higher percentages of homoplasmic SNPs per total SNPs than the others with significant difference ( $p < 0.05$ ).

### **Supplementary Figure S2**

The frequency distribution of homoplasmic SNPs in coding sequences occurring in 1,170 clinical *M. tuberculosis* isolates.

### **Supplementary Figure S3**

SNP calling workflow performed in this study

## Supplementary Figure S4

Position of homoplastic G1340208A SNP (G860A) of *ppe18* in phylogenetic tree of 1,170 *M. tuberculosis* isolates. The phylogeny was reconstructed using Bayesian Interference (BI) methods, which included 4 major lineages (L1: Indo-Oceanic family, L2: East Asian family, L3: East-African Indian family, L4: Euro-American) and 38 sublineages of L1, L2 and L4. Dark blue lines correspond to Mtb isolates carrying homoplastic SNP (G860A). The G860A SNPs were found in all L1 and L2.2 isolates as well as 4 isolates of L4.5.2. Color background shading represents to all Mtb isolates in that sublineages carrying the homoplastic SNPs.

## Supplementary Tables S1

Microsoft excel file containing the list of homoplastic SNPs identified in this study. **Sheet1:** **Table S1.1** corresponds to homoplastic nonsynonymous SNPs found in coding sequences of 8 different functional categories, **Sheet 2: Table S1.2** Homoplastic SNPs in anti-TB resistance genes, **Sheet 3: Table S1.3** Homoplastic SNPs in predicted promoter and **Sheet 4: Table S1.4** homoplastic SNPs in intergenic regions of Mtb genes.

## Supplementary Tables S2

The number and the density of homoplastic SNPs in *pe/ppe* genes.

## Supplementary Table S3

Distribution of homoplastic SNPs in coding regions among 4 different major Mtb lineages.

## Supplementary Table S4

Distribution of total homoplastic SNPs and homoplastic nonsynonymous SNPs in genes categorized according to essentiality, virulence and antigenicity.

### **Supplementary Table S5**

The homoplastic nsSNPs causing amino acid changes in T cell epitope regions of antigenic proteins.

### **Supplementary Table S6**

Microsoft excel file containing the homoplastic and non-homoplastic SNPs presenting in *ppe18*, *ppe19*, *ppe57*, *ppe59*, *ppe60* genes as shown in Table S6.1-S6.5, respectively (**Sheet 1-5**). **Sheet 6: Table S6.6**; Representation of average number of total SNPs and homoplastic SNPs in 5 *ppe* genes of 4 Mtb lineages.

### **Supplementary Table S7**

Microsoft excel file containing the SNPs occurring in *ppe18*, *ppe19*, *ppe57*, *ppe59* and *ppe60* identified in 154 complete genomes of *M. tuberculosis* deposited in Genbank database.

### **Supplementary Table S8**

List of top-ranking homoplastic SNPs associated with demographic and clinical characteristics of the patients, including anti-TB drug resistance, Treatment outcomes, HIV status and AFB smear positivity.

### **Supplementary Table S9**

Nucleotide sequences of primers used in the study of the DATIN promoter region.

## **Supplementary data: Predicted functional effects of nonsynonymous SNPs on protein function**

### **- Genes related to anti-tuberculosis agents**

Point mutations in resistance-related genes were primary molecular mechanism of resistance to anti-mycobacterial agents. Among 31 genes related to drug resistance<sup>1-3</sup>, 13 genes contained homoplastic SNPs (Supplementary Table S1). Nine homoplastic SNPs in our study were previously identified as first line drug resistance-associated mutations<sup>2,4</sup>. It was consistent with our study population that the strains carrying these SNPs were associated with drug resistance (Supplementary Table S1). These mutations were *katG*315, *inhA*94 and -15C/T *inhA* promoter for isoniazid resistance, *rpoB* codon 445 and 450 for rifampicin resistance, *rpsL* codon 43 and 88 as well as *rrs* A514C and C517T for streptomycin resistance. Besides, we revealed the homoplastic SNPs in genes related to second-line drug resistance; E223K substitution in *ethA* (encodes monooxygenase enzyme which activates prodrug ethionamide); C213R and P156T mutation in *Rv2688c* (encodes ABC Fluoroquinolones efflux pump); P188A substitution in *cycA* (transporter protein responsible for uptake of D-cycloserine).

### **- Genes related to MTB virulence**

The effects of homoplastic nonsynonymous SNPs in genes related to virulence were predicted by all three algorithms (SNAP, polyphen-1, SIFT) as deleterious on protein function, including G96C, T926C in *ppe18* as shown in Supplementary Table S1.

Another notable mutation was E276K in *Rv3283* (*sseA*) encoding probable thiosulfate sulfurtransferase enzyme that involves in anti-oxidative stress mechanism. The E276K mutation was reported to associate with the low abundance of *SseA* protein in modern Beijing B0/W148 strains<sup>5</sup>. These strains showed virulence properties including high transmission rate and multidrug resistance<sup>6,7</sup>. It has been proposed that low *sseA* protein level might result in the accumulation of reactive oxygen species (ROS)

and lead to induce of DNA mutations resulting in anti-tuberculosis resistance development. Nevertheless we found the E276K mutation in all 235 modern Beijing strains as well as an ancestral Beijing isolate.

#### **- Genes related to cell surface-exposed lipid and lipid metabolism**

Cell envelope of MTB is unique and complex, composes of diverse kinds of lipid and glycolipid components. Surface-exposed lipid components of cell envelope include mycolic acids, phthiocerol dimycocerosates (PDIMs), phenolic glycolipids (PGLs), lipomannan (LM), lipoarabinomannan (LAM), sulfolipid-1 (SL-1) and acyltrehalose. These molecules have major roles in host-pathogen interactions during TB infection, such as; entry into macrophage, inhibition of phagolysosome fusion, modulating pro- and anti-inflammatory cytokines<sup>8</sup>. These lipid moieties also serve as antigens that bind to CD1 molecule of antigen presenting cells and then were presented to T lymphocytes<sup>9</sup>. Our investigation found a set of homoplasmic SNPs that has high probability to impact on protein function as in the following categories (Supplementary Table S1); *i*) polyketide synthase genes (*pks13* participated in mycolic acid synthesis, *pks5* and *pks12* related to lipooligosaccharides biosynthesis)<sup>10,11</sup>, *ii*) *papA1* gene encodes acyltransferase enzyme which is essential for sulfolipid-1 biosynthesis<sup>12</sup>, *iii*) genes related  $\beta$ -oxidation of fatty acid (*fadB*, *fadB3*, *fadE20*). Fatty acids are considered as main carbon source of MTB during infection and latent state. Besides, the  $\beta$ -oxidation of fatty acids plays significant role in formation of cell envelope lipid, especially SL-1, DAT and PAT<sup>13</sup>.

#### **- Genes related to cell wall and cell process**

We found the homoplasmic nsSNPs that have high potential to affect protein function, in the ESX-family proteins (*esxH*, *esxJ*, *esxL*, *esxR*, *esxO*, *espB* and *eccB1* and *eccA2*), the membrane proteins participated in lipid export across cell wall (*mmpL1*, *mmpL9* and *mmpL12*) and *lpqW* lipoprotein related to biosynthesis of lipoarabinomannan (LAM) in the cell envelope (Supplementary Table S1).

## Supplementary References

- 1 Palomino, J. C. & Martin, A. Drug Resistance Mechanisms in *Mycobacterium tuberculosis*. *Antibiotics (Basel)* **3**, 317-340 (2014).
- 2 Roycroft, E. et al. Molecular epidemiology of multi- and extensively-drug-resistant *Mycobacterium tuberculosis* in Ireland, 2001-2014. *J Infect* **76**, 55-67 (2018).
- 3 Zhang, Y. The magic bullets and tuberculosis drug targets. *Annu Rev Pharmacol Toxicol* **45**, 529-564 (2005).
- 4 Hazbon, M. H. et al. Convergent evolutionary analysis identifies significant mutations in drug resistance targets of *Mycobacterium tuberculosis*. *Antimicrob Agents Chemother* **52**, 3369-3376 (2008).
- 5 Bespyatykh, J. et al. Proteome analysis of the *Mycobacterium tuberculosis* Beijing B0/W148 cluster. *Sci Rep* **6**, 28985 (2016).
- 6 Mokrousov, I. Insights into the origin, emergence, and current spread of a successful Russian clone of *Mycobacterium tuberculosis*. *Clin Microbiol Rev* **26**, 342-360 (2013).
- 7 Lasunskaja, E. et al. Emerging multidrug resistant *Mycobacterium tuberculosis* strains of the Beijing genotype circulating in Russia express a pattern of biological properties associated with enhanced virulence. *Microbes Infect* **12**, 467-475 (2010)
- 8 Jackson, M. The mycobacterial cell envelope-lipids. *Cold Spring Harb Perspect Med* **4**, (2014).
- 9 Van Rhijn, I. & Moody, D. B. CD1 and mycobacterial lipids activate human T cells. *Immunol Rev* **264**, 138-153 (2015).
- 10 Rousseau, C. et al. Virulence attenuation of two Mas-like polyketide synthase mutants of *Mycobacterium tuberculosis*. *Microbiology* **149**, 1837-1847 (2003).

- 11 Sirakova, T. D., Dubey, V. S., Kim, H. J., Cynamon, M. H. & Kolattukudy, P. E. The largest open reading frame (*pks12*) in the *Mycobacterium tuberculosis* genome is involved in pathogenesis and dimycocerosyl phthiocerol synthesis. *Infect Immun* **71**, 3794-3801 (2003).
- 12 Kumar, P. et al. *PapA1* and *PapA2* are acyltransferases essential for the biosynthesis of the *Mycobacterium tuberculosis* virulence factor sulfolipid-1. *Proc Natl Acad Sci U S A* **104**, 11221-11226 (2007).
- 13 Lee, W., VanderVen, B. C., Fahey, R. J. & Russell, D. G. Intracellular *Mycobacterium tuberculosis* exploits host-derived fatty acids to limit metabolic stress. *J Biol Chem* **288**, 6788-6800 (2013).



## Supplementary figures

Figure S1

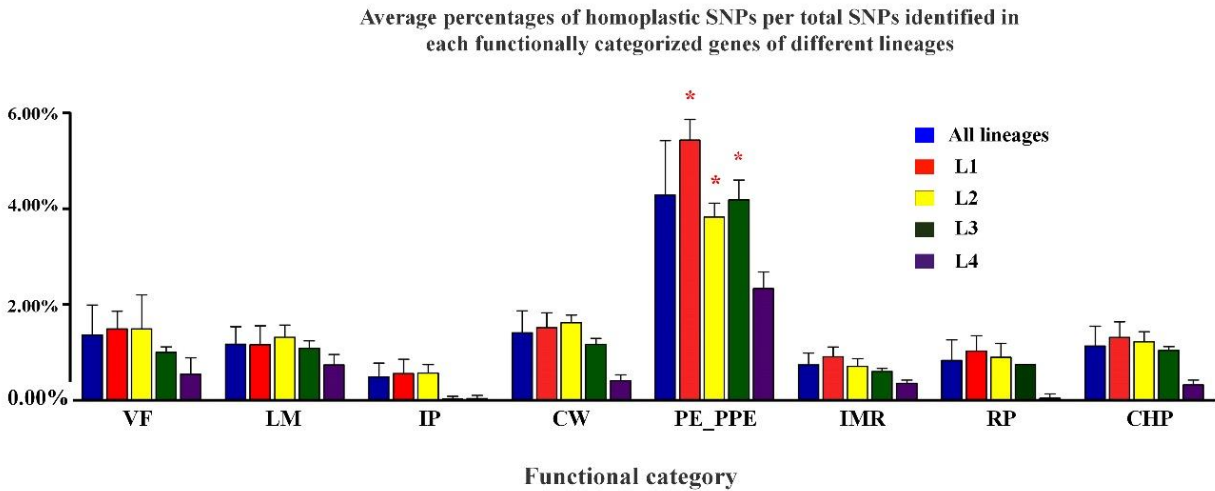

**Figure S1** Representation of average percentages of homoplasic SNPs per total SNPs identified in each functionally categorized genes of 4 different Mtb lineages: *i*) virulence and detoxification (VF, n=226), *ii*) lipid metabolism (LM, n=238), *iii*) information pathway (IP, n=232), *iv*) cell wall and cell process (CW, n=751), *v*) *pe/ppe* family protein (PE\_PPE, n=168), *vi*) intermediary metabolism and respiration (IMR, n=898), *vii*) regulatory protein (RP, n=193), *viii*) conserved hypothetical protein (CHP, n=1,163). Statistical differences were evaluated with the nonparametric kruskal-wallis test. Asterisks (\*) showed the *pe/ppe* groups of Mtb lineage 1, 2 and 3 had higher percentages of homoplasic SNPs per total SNPs than the others with significant difference ( $p < 0.05$ ).

**Figure S2**

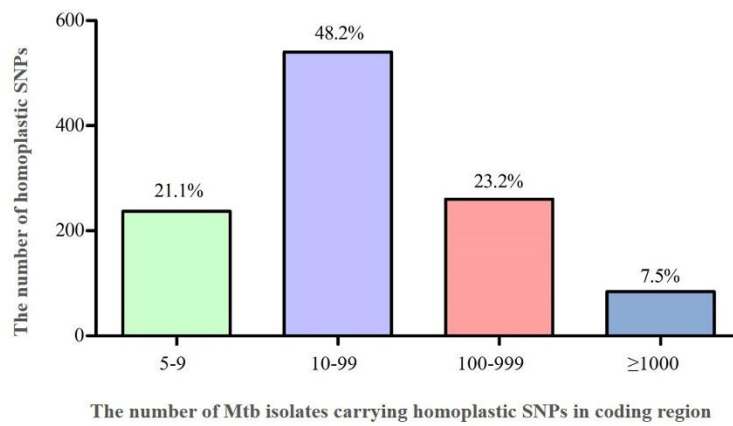

**Figure S2** The frequency distribution of homoplastic SNPs in coding sequences occurring in 1,170 clinical *M. tuberculosis* isolates.

Figure S3

### SNP calling workflow

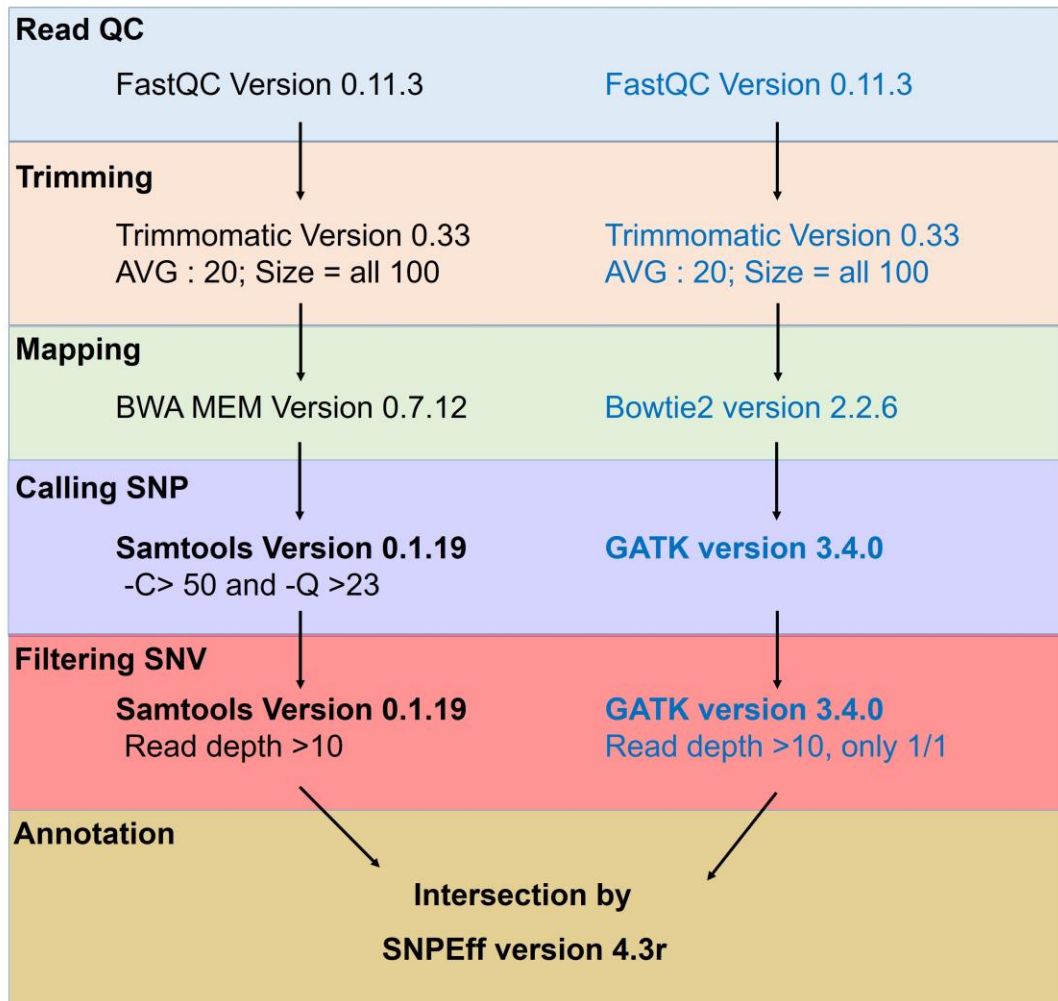

Figure S3 SNP calling workflow performed in this study

**Figure S4**

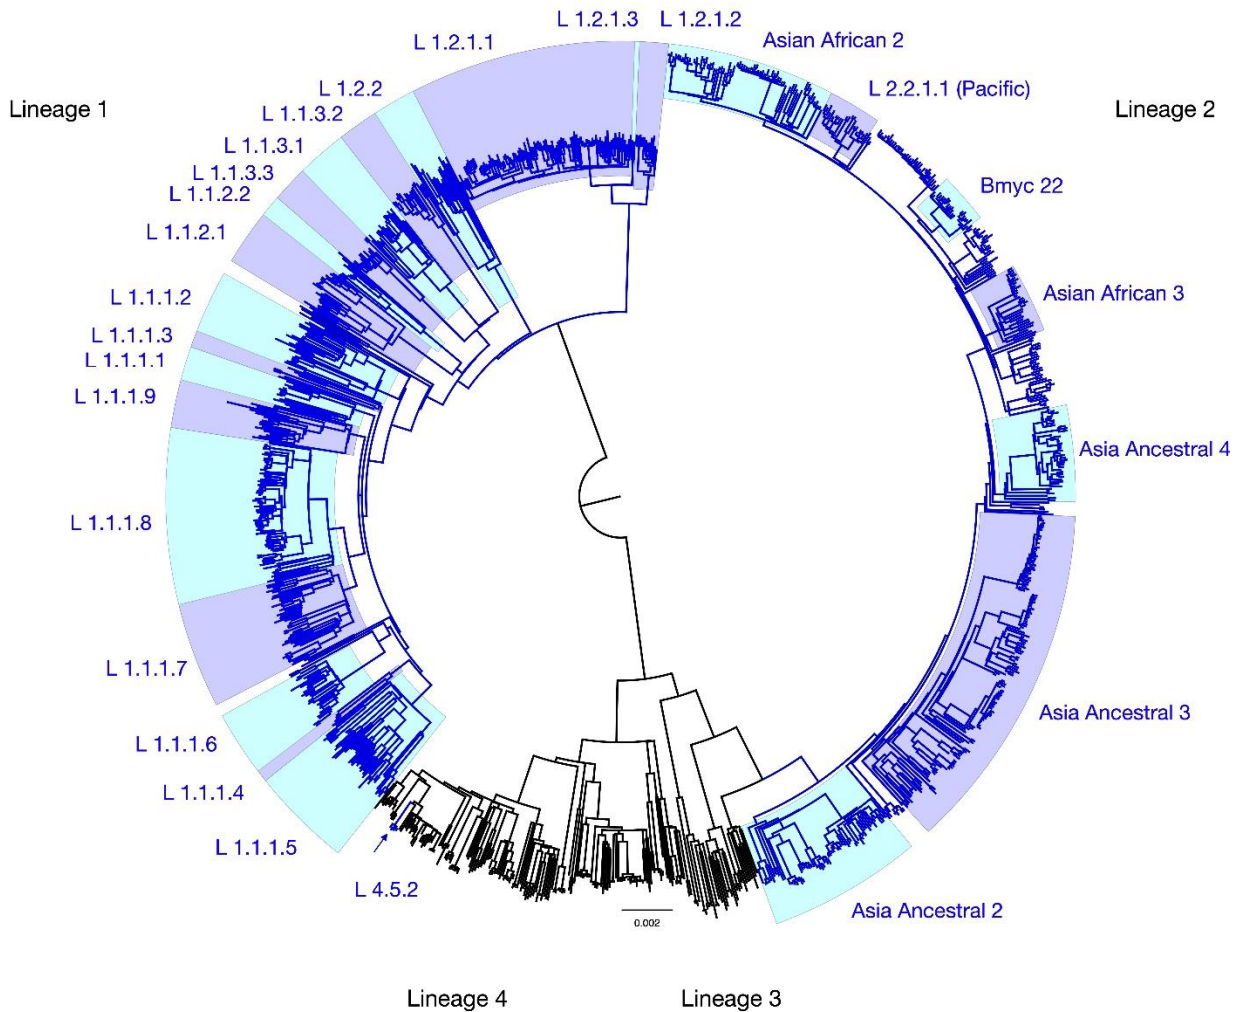

**Supplementary Figure S4:** Position of homoplastic G1340208A SNP (G860A) of *ppe18* in phylogenetic tree of 1,170 *M. tuberculosis* isolates. The phylogeny was reconstructed using Bayesian Interference (BI) methods, which included 4 major lineages (L1: Indo-Oceanic family, L2: East Asian family, L3: East-African Indian family, L4: Euro-American) and 38 sublineages of L1, L2 and L4. Dark blue lines correspond to *Mtb* isolates carrying homoplastic SNPs. The G860A SNPs were found in all L1 and L2.2 isolates and 4 isolates of L4.5.2. Color background shading represents to all isolates of that sublineage carrying the homoplastic SNPs.

## Supplementary Tables

### Supplementary Table S2 The number and the density of homoplasic SNPs in *pe/ppe* genes

| Gene ( <i>Rv</i> ) | Gene name        | Gene length (bp) | No. of homoplasic sSNPs | No. of homoplasic nsSNPs | Total no. of homoplasic SNPs | Total no. of non-homoplasic SNPs | Total no. of all SNP types | No. homoplasic SNPs per gene length | No. homoplasic nsSNPs per gene length | Ratio of homoplasic SNPs to all SNPs | Ratio of homoplasic nsSNPs to all SNPs |
|--------------------|------------------|------------------|-------------------------|--------------------------|------------------------------|----------------------------------|----------------------------|-------------------------------------|---------------------------------------|--------------------------------------|----------------------------------------|
| <i>Rv1196</i>      | <i>ppe18</i>     | 1176             | 15                      | 22                       | 37                           | 2                                | 39                         | 0.031                               | 0.019                                 | 0.949                                | 0.564                                  |
| <i>Rv3478</i>      | <i>ppe60</i>     | 1182             | 11                      | 19                       | 30                           | 7                                | 37                         | 0.025                               | 0.016                                 | 0.811                                | 0.514                                  |
| <i>Rv3429</i>      | <i>ppe59</i>     | 537              | 3                       | 9                        | 12                           | 7                                | 19                         | 0.022                               | 0.017                                 | 0.632                                | 0.474                                  |
| <i>Rv1361c</i>     | <i>ppe19</i>     | 1191             | 11                      | 7                        | 18                           | 3                                | 21                         | 0.015                               | 0.006                                 | 0.857                                | 0.333                                  |
| <i>Rv3425</i>      | <i>ppe57</i>     | 531              | 3                       | 3                        | 6                            | 0                                | 6                          | 0.011                               | 0.006                                 | 1.000                                | 0.500                                  |
| <i>Rv1452c</i>     | <i>pe_pgrs28</i> | 2226             | 16                      | 6                        | 22                           | 13                               | 35                         | 0.010                               | 0.003                                 | 0.629                                | 0.171                                  |
| <i>Rv0279c</i>     | <i>pe_pgrs4</i>  | 2514             | 12                      | 9                        | 21                           | 11                               | 32                         | 0.008                               | 0.004                                 | 0.656                                | 0.281                                  |
| <i>Rv0980c</i>     | <i>pe_pgrs18</i> | 1374             | 6                       | 4                        | 10                           | 3                                | 13                         | 0.007                               | 0.003                                 | 0.769                                | 0.308                                  |
| <i>Rv3343c</i>     | <i>ppe54</i>     | 7572             | 25                      | 15                       | 40                           | 17                               | 57                         | 0.005                               | 0.002                                 | 0.702                                | 0.263                                  |
| <i>Rv3018c</i>     | <i>ppe46</i>     | 1305             | 5                       | 1                        | 6                            | 3                                | 9                          | 0.005                               | 0.001                                 | 0.667                                | 0.111                                  |
| <i>Rv3426</i>      | <i>ppe58</i>     | 699              | 0                       | 3                        | 3                            | 0                                | 3                          | 0.004                               | 0.004                                 | 1.000                                | 1.000                                  |
| <i>Rv2591</i>      | <i>pe_pgrs44</i> | 1632             | 3                       | 3                        | 6                            | 11                               | 17                         | 0.004                               | 0.002                                 | 0.353                                | 0.176                                  |
| <i>Rv1068c</i>     | <i>pe_pgrs20</i> | 1392             | 4                       | 1                        | 5                            | 5                                | 10                         | 0.004                               | 0.001                                 | 0.500                                | 0.100                                  |
| <i>Rv2107</i>      | <i>pe22</i>      | 297              | 1                       | 0                        | 1                            | 0                                | 1                          | 0.003                               | 0.000                                 | 1.000                                | 0.000                                  |
| <i>Rv1788</i>      | <i>pe18</i>      | 300              | 0                       | 1                        | 1                            | 1                                | 2                          | 0.003                               | 0.003                                 | 0.500                                | 0.500                                  |
| <i>Rv3872</i>      | <i>pe35</i>      | 300              | 0                       | 1                        | 1                            | 2                                | 3                          | 0.003                               | 0.003                                 | 0.333                                | 0.333                                  |
| <i>Rv3022A</i>     | <i>pe29</i>      | 315              | 0                       | 1                        | 1                            | 1                                | 2                          | 0.003                               | 0.003                                 | 0.500                                | 0.500                                  |
| <i>Rv0278c</i>     | <i>pe_pgrs3</i>  | 2874             | 6                       | 3                        | 9                            | 13                               | 22                         | 0.003                               | 0.001                                 | 0.409                                | 0.136                                  |
| <i>Rv0978c</i>     | <i>pe_pgrs17</i> | 996              | 2                       | 1                        | 3                            | 2                                | 5                          | 0.003                               | 0.001                                 | 0.600                                | 0.200                                  |
| <i>Rv1450c</i>     | <i>pe_pgrs27</i> | 3990             | 8                       | 4                        | 12                           | 14                               | 26                         | 0.003                               | 0.001                                 | 0.462                                | 0.154                                  |
| <i>Rv0532</i>      | <i>pe_pgrs6</i>  | 1785             | 3                       | 2                        | 5                            | 7                                | 12                         | 0.003                               | 0.001                                 | 0.417                                | 0.167                                  |
| <i>Rv1787</i>      | <i>ppe25</i>     | 1098             | 1                       | 2                        | 3                            | 4                                | 7                          | 0.003                               | 0.002                                 | 0.429                                | 0.286                                  |
| <i>Rv3514</i>      | <i>pe_pgrs57</i> | 4470             | 5                       | 7                        | 12                           | 12                               | 24                         | 0.003                               | 0.002                                 | 0.500                                | 0.292                                  |

| Gene (Rv) | Gene name | Gene length (bp) | No. of homoplastic sSNPs | No. of homoplastic nsSNPs | Total no. of homoplastic SNPs | Total no. of non-homoplastic SNPs | Total no. of all SNP types | No. homoplastic SNPs per gene length | No. homoplastic nsSNPs per gene length | Ratio of homoplastic SNPs to all SNPs | Ratio of homoplastic nsSNPs to all SNPs |
|-----------|-----------|------------------|--------------------------|---------------------------|-------------------------------|-----------------------------------|----------------------------|--------------------------------------|----------------------------------------|---------------------------------------|-----------------------------------------|
| Rv0746    | pe_pgrs9  | 2352             | 2                        | 4                         | 6                             | 4                                 | 10                         | 0.003                                | 0.002                                  | 0.600                                 | 0.400                                   |
| Rv1067c   | pe_pgrs19 | 2004             | 2                        | 3                         | 5                             | 6                                 | 11                         | 0.002                                | 0.001                                  | 0.455                                 | 0.273                                   |
| Rv3347c   | ppe55     | 9474             | 10                       | 13                        | 23                            | 35                                | 58                         | 0.002                                | 0.001                                  | 0.397                                 | 0.224                                   |
| Rv2769c   | pe27      | 828              | 0                        | 2                         | 2                             | 2                                 | 4                          | 0.002                                | 0.002                                  | 0.500                                 | 0.500                                   |
| Rv3511    | pe_pgrs55 | 2145             | 2                        | 3                         | 5                             | 12                                | 17                         | 0.002                                | 0.001                                  | 0.294                                 | 0.176                                   |
| Rv2615c   | pe_pgrs45 | 1386             | 2                        | 1                         | 3                             | 8                                 | 11                         | 0.002                                | 0.001                                  | 0.273                                 | 0.091                                   |
| Rv0742    | pe_pgrs8  | 528              | 1                        | 0                         | 1                             | 2                                 | 3                          | 0.002                                | 0.000                                  | 0.333                                 | 0.000                                   |
| Rv2353c   | ppe39     | 1065             | 1                        | 1                         | 2                             | 1                                 | 3                          | 0.002                                | 0.001                                  | 0.667                                 | 0.333                                   |
| Rv2162c   | pe_pgrs38 | 1599             | 3                        | 0                         | 3                             | 8                                 | 11                         | 0.002                                | 0.000                                  | 0.273                                 | 0.000                                   |
| Rv0280    | ppe3      | 1611             | 0                        | 3                         | 3                             | 3                                 | 6                          | 0.002                                | 0.002                                  | 0.500                                 | 0.500                                   |
| Rv3508    | pe_pgrs54 | 5706             | 3                        | 7                         | 10                            | 16                                | 26                         | 0.002                                | 0.001                                  | 0.385                                 | 0.269                                   |
| Rv3507    | pe_pgrs53 | 4146             | 3                        | 4                         | 7                             | 17                                | 24                         | 0.002                                | 0.001                                  | 0.292                                 | 0.167                                   |
| Rv0305c   | ppe6      | 2892             | 2                        | 2                         | 4                             | 11                                | 15                         | 0.001                                | 0.001                                  | 0.267                                 | 0.133                                   |
| Rv0124    | pe_pgrs2  | 1464             | 1                        | 1                         | 2                             | 4                                 | 6                          | 0.001                                | 0.001                                  | 0.333                                 | 0.167                                   |
| Rv3350c   | ppe56     | 11151            | 7                        | 8                         | 15                            | 55                                | 70                         | 0.001                                | 0.001                                  | 0.214                                 | 0.114                                   |
| Rv3345c   | pe_pgrs50 | 4617             | 3                        | 3                         | 6                             | 21                                | 27                         | 0.001                                | 0.001                                  | 0.222                                 | 0.111                                   |
| Rv2741    | pe_pgrs47 | 1578             | 1                        | 1                         | 2                             | 9                                 | 11                         | 0.001                                | 0.001                                  | 0.182                                 | 0.091                                   |
| Rv1753c   | ppe24     | 3162             | 3                        | 1                         | 4                             | 9                                 | 13                         | 0.001                                | 0.000                                  | 0.308                                 | 0.077                                   |
| Rv1091    | pe_pgrs22 | 2562             | 1                        | 2                         | 3                             | 14                                | 17                         | 0.001                                | 0.001                                  | 0.176                                 | 0.118                                   |
| Rv0754    | pe_pgrs11 | 1755             | 2                        | 0                         | 2                             | 5                                 | 7                          | 0.001                                | 0.000                                  | 0.286                                 | 0.000                                   |
| Rv1803c   | pe_pgrs32 | 1920             | 1                        | 1                         | 2                             | 6                                 | 8                          | 0.001                                | 0.001                                  | 0.250                                 | 0.125                                   |
| Rv0578c   | pe_pgrs7  | 3921             | 1                        | 3                         | 4                             | 16                                | 20                         | 0.001                                | 0.001                                  | 0.200                                 | 0.150                                   |
| Rv1790    | ppe27     | 1053             | 1                        | 0                         | 1                             | 1                                 | 2                          | 0.001                                | 0.000                                  | 0.500                                 | 0.000                                   |
| Rv3388    | pe_pgrs52 | 2196             | 1                        | 1                         | 2                             | 7                                 | 9                          | 0.001                                | 0.000                                  | 0.222                                 | 0.111                                   |
| Rv2328    | pe23      | 1149             | 0                        | 1                         | 1                             | 3                                 | 4                          | 0.001                                | 0.001                                  | 0.250                                 | 0.250                                   |
| Rv2770c   | ppe44     | 1149             | 0                        | 1                         | 1                             | 5                                 | 6                          | 0.001                                | 0.001                                  | 0.167                                 | 0.167                                   |
| Rv1087    | pe_pgrs21 | 2304             | 1                        | 1                         | 2                             | 10                                | 12                         | 0.001                                | 0.000                                  | 0.167                                 | 0.083                                   |
| Rv1706c   | ppe23     | 1185             | 0                        | 1                         | 1                             | 1                                 | 2                          | 0.001                                | 0.001                                  | 0.500                                 | 0.500                                   |

| Gene (Rv) | Gene name        | Gene length (bp) | No. of homoplastic sSNPs | No. of homoplastic nsSNPs | Total no. of homoplastic SNPs | Total no. of non-homoplastic SNPs | Total no. of all SNP types | No. homoplastic SNPs per gene length | No. homoplastic nsSNPs per gene length | Ratio of homoplastic SNPs to all SNPs | Ratio of homoplastic nsSNPs to all SNPs |
|-----------|------------------|------------------|--------------------------|---------------------------|-------------------------------|-----------------------------------|----------------------------|--------------------------------------|----------------------------------------|---------------------------------------|-----------------------------------------|
| Rv2892c   | <i>ppe45</i>     | 1227             | 0                        | 1                         | 1                             | 0                                 | 1                          | 0.001                                | 0.001                                  | 1.000                                 | 1.000                                   |
| Rv2340c   | <i>pe_pgrs39</i> | 1242             | 1                        | 0                         | 1                             | 3                                 | 4                          | 0.001                                | 0.000                                  | 0.250                                 | 0.000                                   |
| Rv3621c   | <i>ppe65</i>     | 1242             | 1                        | 0                         | 1                             | 5                                 | 6                          | 0.001                                | 0.000                                  | 0.167                                 | 0.000                                   |
| Rv3595c   | <i>pe_pgrs59</i> | 1320             | 1                        | 0                         | 1                             | 5                                 | 6                          | 0.001                                | 0.000                                  | 0.167                                 | 0.000                                   |
| Rv0834c   | <i>pe_pgrs14</i> | 2649             | 1                        | 1                         | 2                             | 10                                | 12                         | 0.001                                | 0.000                                  | 0.167                                 | 0.083                                   |
| Rv0878c   | <i>ppe13</i>     | 1332             | 0                        | 1                         | 1                             | 4                                 | 5                          | 0.001                                | 0.001                                  | 0.200                                 | 0.200                                   |
| Rv1802    | <i>ppe30</i>     | 1392             | 0                        | 1                         | 1                             | 5                                 | 6                          | 0.001                                | 0.001                                  | 0.167                                 | 0.167                                   |
| Rv3344c   | <i>pe_pgrs49</i> | 1455             | 0                        | 1                         | 1                             | 4                                 | 5                          | 0.001                                | 0.001                                  | 0.200                                 | 0.200                                   |
| Rv1917c   | <i>ppe34</i>     | 4380             | 1                        | 2                         | 3                             | 11                                | 14                         | 0.001                                | 0.000                                  | 0.214                                 | 0.143                                   |
| Rv1441c   | <i>pe_pgrs26</i> | 1476             | 0                        | 1                         | 1                             | 1                                 | 2                          | 0.001                                | 0.001                                  | 0.500                                 | 0.500                                   |
| Rv0109    | <i>pe_pgrs1</i>  | 1491             | 0                        | 1                         | 1                             | 6                                 | 7                          | 0.001                                | 0.001                                  | 0.143                                 | 0.143                                   |
| Rv1818c   | <i>pe_pgrs33</i> | 1497             | 1                        | 0                         | 1                             | 7                                 | 8                          | 0.001                                | 0.001                                  | 0.125                                 | 0.000                                   |
| Rv3812    | <i>pe_pgrs62</i> | 1515             | 0                        | 1                         | 1                             | 7                                 | 8                          | 0.001                                | 0.001                                  | 0.125                                 | 0.125                                   |
| Rv0152c   | <i>pe2</i>       | 1578             | 1                        | 0                         | 1                             | 7                                 | 8                          | 0.001                                | 0.000                                  | 0.125                                 | 0.000                                   |
| Rv1983    | <i>pe_pgrs35</i> | 1677             | 0                        | 1                         | 1                             | 4                                 | 5                          | 0.001                                | 0.001                                  | 0.200                                 | 0.200                                   |
| Rv3159c   | <i>ppe53</i>     | 1773             | 0                        | 1                         | 1                             | 8                                 | 9                          | 0.001                                | 0.001                                  | 0.111                                 | 0.111                                   |
| Rv0297    | <i>pe_pgrs5</i>  | 1776             | 1                        | 0                         | 1                             | 7                                 | 8                          | 0.001                                | 0.000                                  | 0.125                                 | 0.000                                   |
| Rv1325c   | <i>pe_pgrs24</i> | 1812             | 0                        | 1                         | 1                             | 5                                 | 6                          | 0.001                                | 0.001                                  | 0.167                                 | 0.167                                   |
| Rv2853    | <i>pe_pgrs48</i> | 1848             | 0                        | 1                         | 1                             | 12                                | 13                         | 0.001                                | 0.001                                  | 0.077                                 | 0.077                                   |
| Rv1768    | <i>pe_pgrs31</i> | 1857             | 1                        | 0                         | 1                             | 7                                 | 8                          | 0.001                                | 0.000                                  | 0.125                                 | 0.000                                   |
| Rv0755c   | <i>ppe12</i>     | 1938             | 1                        | 0                         | 1                             | 7                                 | 8                          | 0.001                                | 0.000                                  | 0.125                                 | 0.000                                   |
| Rv0355c   | <i>ppe8</i>      | 9903             | 2                        | 3                         | 5                             | 49                                | 54                         | 0.001                                | 0.000                                  | 0.093                                 | 0.056                                   |
| Rv2634c   | <i>pe_pgrs46</i> | 2337             | 0                        | 1                         | 1                             | 16                                | 17                         | 0.000                                | 0.000                                  | 0.059                                 | 0.059                                   |
| Rv2490c   | <i>pe_pgrs43</i> | 4983             | 1                        | 1                         | 2                             | 17                                | 19                         | 0.000                                | 0.000                                  | 0.105                                 | 0.053                                   |
| Rv1759c   | <i>wag22</i>     | 2745             | 1                        | 0                         | 1                             | 6                                 | 7                          | 0.000                                | 0.000                                  | 0.143                                 | 0.000                                   |
| Rv1651c   | <i>pe_pgrs30</i> | 3036             | 1                        | 0                         | 1                             | 13                                | 14                         | 0.000                                | 0.000                                  | 0.071                                 | 0.000                                   |
| Rv0304c   | <i>ppe5</i>      | 6615             | 0                        | 1                         | 1                             | 27                                | 28                         | 0.000                                | 0.000                                  | 0.036                                 | 0.036                                   |

**Supplementary Table S3:** Distribution of homoplastic SNPs in coding regions among 4 different major Mtb lineages

| <b>Lineage (L)</b> | <b>No. of homoplastic SNPs</b> | <b>% of homoplastic SNPs</b> |
|--------------------|--------------------------------|------------------------------|
| All lineages       | 115                            | 10.3                         |
| Within L1          | 310                            | 27.7                         |
| Within L2          | 119                            | 10.6                         |
| Within L3          | 3                              | 0.3                          |
| Within L4          | 20                             | 1.8                          |
| L1&L2              | 142                            | 12.7                         |
| L1&L3              | 25                             | 2.2                          |
| L1&L4              | 126                            | 11.2                         |
| L2&L3              | 10                             | 0.9                          |
| L2&L4              | 59                             | 5.3                          |
| L3&L4              | 6                              | 0.5                          |
| L1&2&3             | 56                             | 5.0                          |
| L1&2&4             | 113                            | 10.0                         |
| L1&3&4             | 6                              | 0.5                          |
| L2&3&4             | 11                             | 1.0                          |
| Total              | 1,121                          | 100                          |



**Supplementary Table S4:** Distribution of total homoplastic SNPs and homoplastic non-synonymous SNPs in genes categorized according to essentiality, virulence and antigenicity

| Functional Category<br>(No. of genes) |                             | No. of genes carrying homoplastic SNPs (%) | No. of homoplastic SNPs in coding sequences | No. of homoplastic |     | Ratio of nsSNP/sNP | Total homoplastic SNP density (per kb) |            | nsSNP density (per kb) |            |
|---------------------------------------|-----------------------------|--------------------------------------------|---------------------------------------------|--------------------|-----|--------------------|----------------------------------------|------------|------------------------|------------|
|                                       |                             |                                            |                                             | nsSNP              | sNP |                    | Median                                 | Min-Max    | Median                 | Min-Max    |
| <b>Essentiality*</b>                  | Essential genes (737)       | 91 (12.4%)                                 | 154                                         | 79                 | 75  | 1.07               | 0.81                                   | 0.19-7.32  | 0.40                   | 0.00-5.50  |
|                                       | Non-essential genes (3,132) | 498 (15.9%)                                | 967                                         | 549                | 418 | 1.31               | 1.052                                  | 0.15-59.65 | 0.68                   | 0.00-38.60 |
| <b>Virulence</b>                      | Virulence genes (399)       | 61 (15.3%)                                 | 139                                         | 77                 | 62  | 1.24               | 0.79                                   | 0.16-31.46 | 0.57                   | 0.00-18.71 |
|                                       | Non-virulence genes (3,470) | 528 (15.2%)                                | 982                                         | 551                | 431 | 1.28               | 1.00                                   | 0.15-59.65 | 0.65                   | 0.00-38.60 |
| <b>Antigenicity</b>                   | Antigens (411)              | 112 (27.3%)                                | 446                                         | 226                | 220 | 1.03               | 0.90                                   | 0.15-59.65 | 0.65                   | 0.00-38.60 |
|                                       | Non antigens (3,458)        | 477 (13.8%)                                | 675                                         | 402                | 273 | 1.47               | 0.99                                   | 0.15-38.60 | 0.65                   | 0.00-17.54 |

Total SNP and nsSNP density (per kb) represent total number of homoplastic SNPs and nsSNPs occurring in each gene category divided by the length of genes carrying SNPs in that category.

\* Total SNP and nsSNP density (per kb) of non-essential group were higher than that of essential group with statistical difference ( $p$ -value < 0.05).

**Supplementary Table S5:** The homoplasic nsSNPs causing amino acid changes in T cell epitope regions of antigenic proteins.

| Gene (Rv) | Gene name | IEDB_ID | T cell epitope sequence                                                | START | END | Nucleotide change | Amino acid change  |
|-----------|-----------|---------|------------------------------------------------------------------------|-------|-----|-------------------|--------------------|
| Rv0010c   | Rv0010c   | 499711  | HSNIKIIRIDEFR <b>Y</b> G                                               | 81    | 96  | A284G             | Tyr95Cys           |
| Rv0288    | esxH      | 42638   | MSQIMYNYP <b>A</b> MLGHAGDM                                            | 1     | 18  | C29T              | Ala10Val           |
|           |           | 226876  | MSQIMYNYP <b>A</b> MLGHAGDMAG                                          | 1     | 20  |                   |                    |
|           |           | 501191  | MSQIMYNYP <b>A</b> MLGHA                                               | 1     | 15  |                   |                    |
|           |           | 103275  | IMYNYP <b>A</b> MLGHAGDM                                               | 4     | 18  |                   |                    |
|           |           | 738161  | IMYNYP <b>A</b> ML                                                     | 4     | 12  |                   |                    |
| Rv0928    | pstS3     | 40438   | LVLDTDS <b>F</b> YRPKRPGSYPIV                                          | 62    | 76  | T895G             | Phe299Val          |
| Rv1037c   | esxI      | 145753  | DVDAHGAMIRA <b>Q</b> AG <b>S</b> LEAEH                                 | 9     | 28  | A59T, C68T        | Gln20Leu, Ser23Leu |
|           |           | 497804  | DAHGAMIRA <b>Q</b> AG <b>S</b> LE                                      | 11    | 25  |                   |                    |
|           |           | 41767   | MIRA <b>Q</b> AG <b>S</b> L                                            | 16    | 24  |                   |                    |
| Rv1038c   | esxJ      | 146003  | SGAGWSGMAEATSLDTM <b>T</b> QM                                          | 41    | 60  | A172G             | Thr58Ala           |
|           |           | 161694  | SGMAEATSLDTM <b>T</b> QM                                               | 46    | 60  |                   |                    |
|           |           | 161601  | ATSLDTM <b>T</b> QMNQAFR                                               | 51    | 65  |                   |                    |
|           |           | 161712  | TM <b>T</b> QMNQAFRNIVNM                                               | 56    | 70  |                   |                    |
| Rv1091    | pe_pgrs22 | 178885  | GAYAAAEAA <span style="color:red">N</span> VSA <b>A</b> <b>Q</b>       | 85    | 99  | G297C             | Gln99His           |
| Rv1196    | ppe18     | 499426  | GSASLVAAA <b>Q</b> M <b>W</b> D <b>S</b> V                             | 21    | 35  | C88A, G96C        | Gln30Lys, Trp32Cys |
|           |           | 503240  | VAAA <b>Q</b> M <b>W</b> D <b>S</b> VASDLF                             | 26    | 40  |                   |                    |
|           |           | 498971  | FQSVVWGLT <b>V</b> GSWIG                                               | 46    | 60  | G163A, T164C      | Val55Met, Val55Ala |
|           |           | 503745  | WGLT <b>V</b> GSWIGSSAGL                                               | 51    | 65  |                   |                    |
|           |           | 499467  | GSWIGSSAGLM <b>V</b> AAA                                               | 56    | 70  | T200C             | Val67Ala           |
|           |           | 236357  | TVPPP <span style="color:red">V</span> IAENRAELMIL <b>I</b> A <b>T</b> | 105   | 124 | T365C             | Ile122Thr          |
|           |           | 103503  | PVIAENRAELMIL <b>I</b> A                                               | 109   | 123 |                   |                    |
|           |           | 103365  | LMIL <b>I</b> A <span style="color:red">T</span> NLLGQNT <b>P</b>      | 118   | 132 |                   |                    |

| Gene (Rv) | Gene name | IEDB_ID | T cell epitope sequence                                  | START | END | Nucleotide change              | Amino acid change                                 |
|-----------|-----------|---------|----------------------------------------------------------|-------|-----|--------------------------------|---------------------------------------------------|
| Rv1196    | ppe18     | 232314  | SSKLGGLW <b>K</b>                                        | 221   | 229 | A686C                          | Lys229Thr                                         |
|           |           | 179457  | <b>R</b> SPISNMVSMANN <b>H</b> M                         | 235   | 249 | G704T, A712C, A745G            | Arg235Leu, Ile238Leu, Met249Val                   |
|           |           | 103007  | AAQAVQTAAQNGV <b>R</b> A                                 | 274   | 288 | G860A                          | Arg287Gln                                         |
| Rv1198    | esxL      | 42814   | MTINYQFGDVD <b>A</b> HGA                                 | 1     | 15  | C35A, A59T, G65C, T68C         | Ala12Asp, Gln20Leu, Gly22Ala, Leu23Ser            |
|           |           | 50756   | QFGDVD <b>A</b> HGAMIRA <b>Q</b>                         | 6     | 20  |                                |                                                   |
|           |           | 7529    | <b>D</b> AHGAMIRAL <b>A</b> GLLE                         | 11    | 25  |                                |                                                   |
|           |           | 966     | AEHQAI <b>I</b> SDVLT <b>A</b> SD                        | 26    | 40  | A94G, C97T, G98C, A109G, A115G | Ile32Val, Arg33Cys, Arg33 Pro, Thr37Ala, Ser39Gly |
|           |           | 967     | AEHQAI <b>V</b> RDVLAAGD                                 | 26    | 40  |                                |                                                   |
|           |           | 225572  | VLTASDFWGGAGS <b>A</b> ACQGFIT <b>Q</b><br><b>L</b> GR   | 35    | 59  | C143T, T169G                   | Ala 48Val, Leu57Val                               |
| Rv1316c   | ppe19     | 118849  | INSARMYAGPGSASLVAA <b>A</b> <b>K</b>                     | 11    | 30  | A88C, G96C                     | Lys30Gln, Trp32Cys                                |
|           |           | 118825  | GSASLVAA <b>A</b> <b>K</b> <b>M</b> WDSV <b>A</b> SDLF   | 21    | 40  |                                |                                                   |
|           |           | 118934  | <b>M</b> WDSV <b>A</b> SDLFSAASAFQ <b>S</b> VV           | 31    | 50  |                                |                                                   |
|           |           | 119007  | SAASAFQ <b>S</b> VVWGLT <b>T</b> GSWIG                   | 41    | 60  | A163G, C164T                   | Thr55Met, Thr55Ala                                |
|           |           | 119050  | WGLT <b>T</b> GSWIGSSAGLMV <b>A</b> AAA                  | 51    | 70  |                                |                                                   |
|           |           | 119020  | SSAGLM <b>V</b> AAASPYVAWMSVT                            | 61    | 80  | T200C                          | Val67Ala                                          |
|           |           | 501193  | <b>M</b> VAAASPYVAWMSVT                                  | 66    | 80  |                                |                                                   |
|           |           | 119033  | TLH <b>S</b> MLKGFAPAAAQAV <b>E</b> TA                   | 261   | 280 | G832C                          | Glu278Gln                                         |
|           |           | 118900  | LSVP <b>Q</b> AWAAANQAVTPAARA                            | 321   | 340 | A974C                          | Gln325Pro                                         |
| Rv1787    | ppe25     | 168525  | <b>F</b> ATGMAQFFASIAQQ                                  | 201   | 215 | C708G                          | Phe236Leu                                         |
| Rv1788    | pe18      | 169831  | TGVVPAAADEV <b>S</b> ALT                                 | 37    | 51  | C143G                          | Ser48Trp                                          |
| Rv1979c   | Rv1979c   | 21773   | GPRT <b>R</b> GYAI                                       | 3     | 11  | A21C                           | Arg7Ser                                           |
| Rv2770c   | ppe44     | 100119  | HQAAAVGQAGASA <b>F</b> ARQVGL                            | 181   | 200 | T581C                          | Phe194Ser                                         |
|           |           | 99903   | ASA <b>F</b> ARQVGLSHLISDVADA                            | 191   | 210 |                                |                                                   |
| Rv2875    | mpt70     | 73311   | YAAANPTGPASVQGM <b>S</b> Q <b>D</b> PV                   | 41    | 60  | G172C                          | Asp58His                                          |
|           |           | 49635   | PTGPASVQGM <b>S</b> Q <b>D</b> PVAVAA <b>S</b> N<br>NPEL | 46    | 70  |                                |                                                   |

| Gene (Rv) | Gene name | IEDB_ID | T cell epitope sequence                 | START | END  | Nucleotide change | Amino acid change     |
|-----------|-----------|---------|-----------------------------------------|-------|------|-------------------|-----------------------|
| Rv3019c   | esxR      | 57048   | AWQGDTGITYQGWTQ <b>WNQ</b>              | 41    | 60   | G174T             | Trp58Cys              |
|           |           | 72986   | WQGDTGITYQGWTQ <b>W</b>                 | 43    | 58   |                   |                       |
|           |           | 106355  | DTGITYQGWTQ <b>WNQ</b>                  | 46    | 60   |                   |                       |
|           |           | 29176   | ITYQGWTQ <b>WNQ</b> ALED                | 49    | 64   |                   |                       |
|           |           | 107025  | YQGWTQ <b>WNQ</b> ALEDL                 | 51    | 65   |                   |                       |
|           |           | 52605   | QTQ <b>WNQ</b> ALEDLVRAYQ               | 55    | 70   |                   |                       |
| Rv3347c   | ppe55     | 103038  | ALMSGN <b>F</b> SNGILWRG                | 997   | 1011 | C2992T, T3007G    | Leu998Phe, Phe1003Val |
| Rv3407    | vapB47    | 110831  | EPARG <b>R</b> KRTLSDVLN                | 79    | 93   | C250T             | Arg84Cys              |
|           |           | 111006  | RG <b>R</b> KRTLSDVLNEMR                | 82    | 96   |                   |                       |
| Rv3425    | ppe57     | 179778  | EEIAANREERRRLIASNVAGVN<br><b>TPA</b>    | 106   | 130  | A382G             | Thr128Ala             |
|           |           | 179909  | SNVAGVNT <b>TPA</b> IADLDAQYDQY<br>RARN | 121   | 145  |                   |                       |
|           |           | 179767  | AQYDQYRA <b>R</b> NVAVMNAYVSW<br>TRSAL  | 136   | 160  | G431A             | Arg144His             |
|           |           | 179772  | AYVSWTRSALS <b>DLPR</b> WREPPQI<br>YRGG | 151   | 176  | T491C             | Pro164Leu             |
| Rv3478    | ppe60     | 179138  | LGGLWTAVSPH <b>LSPL</b>                 | 224   | 238  | T704G, C712A      | Leu235Arg, Leu238Ile  |
|           |           | 178559  | AQNGV <b>W</b> AMSSLGSSL                | 281   | 295  | T856C, T857A      | Trp286Arg, Trp286*    |
| Rv3619c   | esxV      | 50756   | QFGDVDAHGAMIRA <b>Q</b>                 | 6     | 20   | C68T              | Gln20Leu              |
|           |           | 103170  | FGDVDAHGAMIRA <b>QA</b>                 | 7     | 21   |                   |                       |
|           |           | 7530    | DAHGAMIRA <b>QA</b> ASLE                | 11    | 25   | A59T              | Ser23Leu              |
| Rv3620c   | esxW      | 146003  | SGAGWSGMAEATSLDTM <b>TQM</b>            | 41    | 60   | A172G             | Thr58Ala              |
|           |           | 161694  | SGMAEATSLDTM <b>TQM</b>                 | 46    | 60   |                   |                       |
|           |           | 161601  | ATSLDTM <b>TQM</b> NQAFR                | 51    | 65   |                   |                       |
|           |           | 161712  | TM <b>TQM</b> NQAFRNIVNM                | 56    | 70   |                   |                       |
| Rv3883c   | mycP1     | 120408  | APYNVRR <b>L</b> PPVVEP                 | 398   | 412  | T1214G            | Leu405Arg             |
| Rv3887c   | eccD2     | 597813  | KRWQTAVVTA <b>V</b> TVCGILAA            | 245   | 264  | G790A             | Ala264Thr             |

\* represented premature stop codon

**Supplementary Table S8:** List of top-ranking homoplastic SNPs associated with demographic and clinical characteristics of the patients, including anti-TB drug resistance, Treatment outcomes, HIV status, and AFB smear positivity.

Table S8.1 List of homoplastic SNPs associated with anti-TB resistance

| Anti-TB drug | Gene (Rv) | Gene name | SNP position | Genotype    | Amino acid | Total no. isolates | No. of isolates |              | Pearson Chi-square statistic Value (p-value)* |
|--------------|-----------|-----------|--------------|-------------|------------|--------------------|-----------------|--------------|-----------------------------------------------|
|              |           |           |              |             |            |                    | resistance      | sensitive    |                                               |
| Isonazid     | Rv1908c   | katG      | 2155168      | wild type G | Ser        | 1,007              | 65 (6.5%)       | 942 (93.5%)  | 545.204 ( $p = 1.00 \times 10^{-13}$ )        |
|              |           |           |              | G944C       | Ser315Thr  | 85                 | 82 (96.5%)      | 3 (3.5%)     |                                               |
|              | Rv0341    | inhA      | 1674481      | wild type T | Ser        | 1,086              | 141 (13%)       | 945 (87%)    | 38.749 ( $p = 5.44 \times 10^{-6}$ )          |
|              |           |           |              | T280G       | Ser94Ala   | 6                  | 6 (100%)        | 0            |                                               |
|              | Rv0341    | inhA      | 1673425      | wild type C |            | 1,059              | 118 (11%)       | 941 (89%)    | 161.617 ( $p = 1.00 \times 10^{-13}$ )        |
|              |           |           |              | -15C/T      |            | 33                 | 29 (88%)        | 4 (12%)      |                                               |
| Rifampicin   | Rv0667    | rpoB      | 761139       | wild type C | His        | 1,076              | 35 (3%)         | 1041 (97%)   | 345.388 ( $p = 1.00 \times 10^{-13}$ )        |
|              |           |           |              | C1333T      | His445Tyr  | 17                 | 17 (100%)       | 0            |                                               |
|              | Rv0667    | rpoB      | 761155       | wild type C | Ser        | 1,078              | 38 (3.5%)       | 1040 (96.5%) | 263.094 ( $p = 1.00 \times 10^{-13}$ )        |
|              |           |           |              | C1349T      | Ser450Leu  | 15                 | 14 (93%)        | 1 (7%)       |                                               |
| Ethambutol   | Rv3795    | embB      | 4247429      | wild type A | Met        | 1,083              | 13 (1%)         | 1070 (99%)   | 145.547 ( $p = 1.59 \times 10^{-7}$ )         |
|              |           |           |              | A916G       | Met306Val  | 10                 | 5 (50%)         | 5 (50%)      |                                               |
| Streptomycin | Rv0682    | rpsL      | 781822       | wild type A | Lys        | 1,073              | 87 (8%)         | 986 (92%)    | 103.735 ( $p = 1.48 \times 10^{-12}$ )        |
|              |           |           |              | A263G       | Lys88Arg   | 20                 | 15 (75%)        | 5 (25%)      |                                               |
|              | Rv0682    | rpsL      | 781687       | wild type A | Lys        | 1,042              | 55 (5%)         | 987 (95%)    | 433.323 ( $p = 1.00 \times 10^{-13}$ )        |
|              |           |           |              | A128G       | Lys43Arg   | 51                 | 47 (92%)        | 4 (8%)       |                                               |
|              | Rv0578c   | pe_pgrs7  | 673564       | wild type G | Ala        | 893                | 53 (6%)         | 840 (94%)    | 66.56 ( $p = 4.20 \times 10^{-13}$ )          |
|              |           |           |              | G2353A      | Ala785Thr  | 200                | 49 (25%)        | 151 (75%)    |                                               |
|              | Rv2471    | aglA      | 2774555      | wild type T | Val        | 875                | 50 (6%)         | 825 (94%)    | 67.863 ( $p = 2.15 \times 10^{-13}$ )         |
|              |           |           |              | T992C       | Val331Ala  | 218                | 52 (24%)        | 166 (76%)    |                                               |
|              | Rv3283    | sseA      | 3665753      | wild type G | Glu        | 865                | 50 (6%)         | 815 (94%)    | 61.824 ( $p = 1.01 \times 10^{-12}$ )         |
|              |           |           |              | G826A       | Glu276Lys  | 228                | 52 (23%)        | 176 (77%)    |                                               |

\*Bonferroni threshold is  $5.80 \times 10^{-6}$

**Table S8.2** List of homoplastic SNPs associated with Treatment outcome

| Gene (Rv) | Gene name | SNP position | Genotype    | Amino acid | Total no. isolates | No. of isolates associated with outcome of treatment |           |            | Pearson Chi-square statistic value ( <i>p</i> -value)* |
|-----------|-----------|--------------|-------------|------------|--------------------|------------------------------------------------------|-----------|------------|--------------------------------------------------------|
|           |           |              |             |            |                    | Cure                                                 | Failure   | Death      |                                                        |
| Rv2346c   | esxO      | 2626105      | wild type T | Leu        | 646                | 559 (86.5%)                                          | 33 (5.1%) | 54 (8.4%)  | 32.883 ( <i>p</i> = 1.11X10 <sup>-7</sup> )            |
|           |           |              | T68C        | Leu23Ser   | 295                | 219 (74.2%)                                          | 12 (4.1%) | 64 (21.7%) |                                                        |
| Rv2346c   | esxO      | 2626108      | wild type G | Gly        | 656                | 567 (86.4%)                                          | 33 (5%)   | 56 (8.5%)  | 31.654 ( <i>p</i> = 2.10X10 <sup>-7</sup> )            |
|           |           |              | G65C        | Gly22Ala   | 285                | 211 (74%)                                            | 12 (4.2%) | 62 (21.8%) |                                                        |
| Rv0749    | vapC31    | 841495       | wild type A | Met        | 559                | 489 (87.5%)                                          | 27 (4.8%) | 43 (7.7%)  | 29.647 ( <i>p</i> = 2.96 X10 <sup>-7</sup> )           |
|           |           |              | A268G       | Met90Val   | 382                | 289 (75.7%)                                          | 18 (4.7%) | 75 (19.6%) |                                                        |
| Rv3111    | moaC1     | 3479561      | wild type G | Asp        | 559                | 488 (87.3%)                                          | 27 (4.8%) | 44 (7.9%)  | 27.497 ( <i>p</i> = 7.86X10 <sup>-7</sup> )            |
|           |           |              | G391A       | Asp131Asn  | 382                | 290 (75.9%)                                          | 18 (4.7%) | 74 (19.4%) |                                                        |
| Rv1650    | pheT      | 1859989      | wild type C | Arg        | 558                | 487 (87.3%)                                          | 27 (4.8%) | 44 (7.9%)  | 27.201 ( <i>p</i> = 9.17X10 <sup>-7</sup> )            |
|           |           |              | C232T       | Arg78Trp   | 383                | 291 (76%)                                            | 18 (4.7%) | 74 (19.3%) |                                                        |
| Rv0578c   | pe_pgrs7  | 673344       | wild type T | Ile        | 562                | 490 (87%)                                            | 27 (5%)   | 45 (8%)    | 26.297 ( <i>p</i> = 1.46X10 <sup>-6</sup> )            |
|           |           |              | T2753A      | Ile858Asn  | 379                | 288 (76%)                                            | 18 (5%)   | 73 (19%)   |                                                        |
| Rv1196    | ppe18     | 1340052      | wild type G | Arg        | 614                | 534 (87%)                                            | 27 (4%)   | 53 (9%)    | 26.003 ( <i>p</i> = 2.19X10 <sup>-6</sup> )            |
|           |           |              | G704T       | Arg235Leu  | 327                | 244 (74.6%)                                          | 18 (6%)   | 65 (20%)   |                                                        |
| Rv2955c   | Rv2955c   | 3308446      | wild type A | Thr        | 560                | 488 (87%)                                            | 27 (5%)   | 45 (8%)    | 25.715 ( <i>p</i> = 2.00X10 <sup>-6</sup> )            |
|           |           |              | A100G       | Thr34Ala   | 381                | 290 (76%)                                            | 18 (5%)   | 73 (19%)   |                                                        |
| Rv3429    | ppe59     | 3847351      | wild type A | Met        | 560                | 488 (87%)                                            | 27 (5%)   | 45 (8%)    | 25.715 ( <i>p</i> = 2.00X10 <sup>-6</sup> )            |
|           |           |              | A187T       | Met63Leu   | 381                | 290 (76%)                                            | 18 (5%)   | 73 (19%)   |                                                        |
| Rv0193c   | Rv0193c   | 225668       | wild type G | Gly        | 559                | 487 (87%)                                            | 27 (5%)   | 45 (8%)    | 25.428 ( <i>p</i> = 2.27X10 <sup>-6</sup> )            |
|           |           |              | G904A       | Gly302Ser  | 382                | 291 (76%)                                            | 18 (5%)   | 73 (19%)   |                                                        |
| Rv1262c   | Rv1262c   | 1410062      | wild type C | Pro        | 559                | 487 (87%)                                            | 27 (5%)   | 45 (8%)    | 25.428 ( <i>p</i> = 2.27X10 <sup>-6</sup> )            |
|           |           |              | C311G       | Pro104Arg  | 382                | 291 (76%)                                            | 18 (5%)   | 73 (19%)   |                                                        |
| Rv1409    | ribG      | 1585283      | wild type A | Lys        | 559                | 487 (87%)                                            | 27 (5%)   | 45 (8%)    | 25.428 ( <i>p</i> = 2.27X10 <sup>-6</sup> )            |
|           |           |              | A90C        | Lys30Asn   | 382                | 291 (76%)                                            | 18 (5%)   | 73 (19%)   |                                                        |
| Rv3347c   | ppe55     | 3745483      | wild type G | Val        | 559                | 487 (87%)                                            | 27 (5%)   | 45 (8%)    | 25.428 ( <i>p</i> = 2.27X10 <sup>-6</sup> )            |
|           |           |              | G7702T      | Val2568Leu | 382                | 291 (76%)                                            | 18 (5%)   | 73 (19%)   |                                                        |
| Rv3507    | pe_pgrs53 | 3928892      | wild type A | Asp        | 559                | 487 (87%)                                            | 27 (5%)   | 45 (8%)    | 25.428 ( <i>p</i> = 2.27X10 <sup>-6</sup> )            |
|           |           |              | A2324G      | Asp775Gly  | 382                | 291 (76%)                                            | 18 (5%)   | 73 (19%)   |                                                        |
| Rv1325c   | pe_pgrs24 | 1488645      | wild type G | Gly        | 579                | 504 (87%)                                            | 27 (5%)   | 48 (8%)    | 25.195 ( <i>p</i> = 2.69X10 <sup>-6</sup> )            |
|           |           |              | G1321C      | Gly441Arg  | 362                | 274 (76%)                                            | 18 (5%)   | 70 (19%)   |                                                        |
| Rv3581c   | ispF      | 4024079      | wild type A | Gln        | 558                | 486 (87%)                                            | 27 (5%)   | 45 (8%)    | 25.144 ( <i>p</i> = 2.65X10 <sup>-6</sup> )            |
|           |           |              | A269G       | Gln90Arg   | 383                | 292 (76%)                                            | 18 (5%)   | 73 (19%)   |                                                        |

\*Bonferroni threshold is 5.80X10<sup>-6</sup>

**Table S8.3** List of homoplasic SNPs associated with HIV status

| Gene (Rv)     | Gene name        | SNP position | Genotype    | Amino acid | Total no. isolates | No. of isolates       |                           | Pearson Chi-square statistic value ( <i>p</i> -value)* |
|---------------|------------------|--------------|-------------|------------|--------------------|-----------------------|---------------------------|--------------------------------------------------------|
|               |                  |              |             |            |                    | found in HIV patients | found in non-HIV patients |                                                        |
| <i>Rv3514</i> | <i>pe_pgrs57</i> | 3948929      | wild type G | Ala        | 899                | 128 (14%)             | 771 (84%)                 | 24.140 ( <i>p</i> = 6.32X10 <sup>-6</sup> )            |
|               |                  |              | G3136C      | Ala1046Pro | 254                | 71 (28%)              | 183 (71%)                 |                                                        |

\*Bonferroni threshold is 5.80X10<sup>-6</sup>

**Table S8.4** List of homoplasic SNPs associated with AFB smear positivity

| Gene (Rv)      | Gene name        | SNP position | Genotype    | Amino acid | Total no. isolates | No. of isolates                   |                                    | Pearson Chi-square statistic value ( <i>p</i> -value)* |
|----------------|------------------|--------------|-------------|------------|--------------------|-----------------------------------|------------------------------------|--------------------------------------------------------|
|                |                  |              |             |            |                    | found in low grade positive smear | found in high grade positive smear |                                                        |
| <i>Rv1067c</i> | <i>pe_pgrs19</i> | 1189745      | wild type T | Val        | 1,161              | 448 (39%)                         | 713 (61%)                          | 4.382 ( <i>p</i> = 0.048)                              |
|                |                  |              | T680C       | Val227Ala  | 7                  | 0                                 | 7 (100%)                           |                                                        |
| <i>Rv3347c</i> | <i>ppe55</i>     | 3750805      | wild type T | Phe        | 1,121              | 438 (39%)                         | 683 (61%)                          | 6.042 ( <i>p</i> = 0.014)                              |
|                |                  |              | T2380G      | Phe794Val  | 47                 | 10 (21%)                          | 37 (79%)                           |                                                        |
| <i>Rv3347c</i> | <i>ppe55</i>     | 3750808      | wild type G | Asp        | 1,122              | 438 (39%)                         | 684 (61%)                          | 5.592 ( <i>p</i> = 0.020)                              |
|                |                  |              | G2377A      | Asp793Asn  | 46                 | 10 (22%)                          | 36 (78%)                           |                                                        |

Low grade refers to scanty or 1+ of AFB smear positivity

High grade refers to 2+ or 3+ of AFB smear positivity

\*Bonferroni threshold is 5.80X10<sup>-6</sup>

**Supplementary Table S9:** Nucleotide sequences of primers used in the study of the *DATIN* promoter region.

---

| Name                                                          | Sequence (5` to 3`)                                     |
|---------------------------------------------------------------|---------------------------------------------------------|
| <b>For amplification of intergenic region of <i>DATIN</i></b> |                                                         |
| Primer <i>DATIN</i> -F                                        | ATT CTA GAG GTG GTG ACA CAG CCC ACA TT                  |
| Primer <i>DATIN</i> -R                                        | TAG GAT CCG GCG ACT GCG TTT CGG TTC CA                  |
| <b>5`RACE</b>                                                 |                                                         |
| Primer oligo d(T) adaptor                                     | CCG GAA TTC AAG CTT CTA GAG GAT CCT TTT TTT TTT TTT TTT |
| Primer PM1 adaptor                                            | CCG GAA TTC AAG CTT CTA GAG GAT CC                      |
| Primer c <i>DATIN</i>                                         | CTG GTC GGT GAA AAA CAG GAA TGG                         |
| Primer GSPD1                                                  | GCA CGA TCT GTC GAT CCA GTC TG                          |
| Primer GSPD2                                                  | GCG CCC TTA ATG GGG TGT CAC                             |
| <b>For sequencing of cloned fragments</b>                     |                                                         |
| Primer PFPV2-F                                                | GAT GTA CGT GGC GAA CTC CG                              |
| Primer PFPV2-R                                                | CCT TCA CCC TCT CCA CTG ACA G                           |

---
